# Supplementary material for: A series of coordination polymers based on terphenyl tetracarboxylates and bis-pyridyl ligands with water vapor sorption properties
Source: Royal Society of Chemistry journal article supplement (doi:10.1039/c6ra25319a), 2017-01-01
Supplement: c6ra25319a1.pdf [file c6ra25319a1.pdf]

# A series of coordination polymers based on terphenyl tetracarboxylates and bis-pyridyl ligands with water vapor sorption properties

Ling Li, Lei Lv and Ru-Dan Huang\*

*Key Laboratory of Cluster Science of Ministry of Education, School of Chemistry,  
Beijing Institute of Technology, Beijing 100081, PR China*

**Table S1.** Selected bond distances (Å) and angles (°) for complexes 1–6.

| Complex 1           |            |                     |            |
|---------------------|------------|---------------------|------------|
| Mn(1)-O(2)#1        | 2.093(3)   | Mn(1)-O(1)          | 2.168(3)   |
| Mn(1)-N(1)          | 2.208(4)   | Mn(1)-O(6)          | 2.225(4)   |
| Mn(1)-O(3)#2        | 2.227(3)   | Mn(1)-O(4)#2        | 2.265(3)   |
| O(2)#1-Mn(1)-O(1)   | 92.39(13)  | O(2)#1-Mn(1)-N(1)   | 95.85(15)  |
| O(1)-Mn(1)-N(1)     | 87.35(15)  | O(2)#1-Mn(1)-O(6)   | 84.95(15)  |
| O(1)-Mn(1)-O(6)     | 175.91(13) | N(1)-Mn(1)-O(6)     | 89.83(16)  |
| O(2)#1-Mn(1)-O(3)#2 | 112.05(13) | O(1)-Mn(1)-O(3)#2   | 96.09(13)  |
| N(1)#1-Mn(1)-O(3)#2 | 151.65(15) | O(2)#1-Mn(1)-O(4)#2 | 168.57(13) |
| O(6)-Mn(1)-O(3)#2   | 87.79(14)  | N(1)-Mn(1)-O(4)#2   | 93.34(14)  |
| O(1)-Mn(1)-O(4)#2   | 94.82(12)  | O(3)#2-Mn(1)-O(4)#2 | 58.36(12)  |
| O(6)-Mn(1)-O(4)#2   | 88.30(14)  |                     |            |
| Complex 2           |            |                     |            |
| Mn(1)-O(9)          | 2.095(9)   | Mn(1)-O(7)          | 2.141(10)  |
| Mn(1)-O(3)          | 2.152(10)  | Mn(1)-O(1)          | 2.156(9)   |
| Mn(1)-O(10)         | 2.287(9)   | Mn(1)-O(5)          | 2.501(9)   |
| Mn(2)-O(4)#1        | 2.149(10)  | Mn(2)-O(9)          | 2.183(10)  |
| Mn(2)-O(8)#1        | 2.184(9)   | Mn(2)-O(9)#1        | 2.193(9)   |
| Mn(2)-O(5)          | 2.323(9)   | Mn(2)-N(1)          | 2.342(12)  |
| O(9)-Mn(1)-O(7)     | 94.1(4)    | O(9)-Mn(1)-O(3)     | 111.2(3)   |
| O(7)-Mn(1)-O(3)     | 87.7(4)    | O(9)-Mn(1)-O(1)     | 83.2(3)    |
| O(7)-Mn(2)-O(1)     | 93.5(4)    | O(9)-Mn(2)-O(10)    | 158.6(3)   |
| O(7)-Mn(2)-O(10)    | 104.5(3)   | O(3)-Mn(2)-O(10)    | 80.5(3)    |
| O(1)-Mn(2)-O(10)    | 85.1(3)    | O(9)-Mn(2)-O(5)     | 76.7(3)    |

|                    |            |                     |            |
|--------------------|------------|---------------------|------------|
| O(7)-Mn(2)-O(5)    | 161.6(3)   | O(3)-Mn(2)-O(5)     | 81.0(3)    |
| O(1)-Mn(2)-O(5)    | 101.1(3)   | O(10)-Mn(2)-O(5)    | 88(3)      |
| O(4)-Mn(2)-O(9)    | 86.8(4)    | O(4)#1-Mn(2)-O(8)#1 | 89.2(4)    |
| O(9)-Mn(2)-O(1)    | 164.7(3)   | O(4)#1-Mn(2)-O(9)#1 | 102.5(3)   |
| O(9)-Mn(2)-O(1)    | 77.5(4)    | O(8)#1-Mn(2)-O(9)#1 | 89.0(3)    |
| O(4)#1-Mn(2)-O(5)  | 151.3(3)   | O(9)-Mn(2)-O(5)     | 79.1(3)    |
| O(8)#1-Mn(2)-O(5)  | 110.4(4)   | O(9)#1-Mn(2)-O(5)   | 98.7(3)    |
| O(4)#1-Mn(2)-N(1)  | 79.6(4)    | O(9)-Mn(2)-N(1)     | 109.0(4)   |
| O(8)#1-Mn(2)-N(1)  | 84.7(4)    | O(9)#1-Mn(2)-N(1)   | 173.4(4)   |
| O(5)-Mn(2)-N(1)    | 81.6(4)    |                     |            |
| <b>Complex 3</b>   |            |                     |            |
| Ni(1)-O(1)         | 2.023(2)   | Ni(1)-O(10)         | 2.0237(19) |
| Ni(1)-O(5)#1       | 2.0503(19) | Ni(1)-N(3)          | 2.111(2)   |
| Ni(1)-N(4)         | 2.118(8)   | Ni(1)-O(9)          | 2.146(2)   |
| O(1)-Ni(1)-O(10)   | 97.07(8)   | O(1)-Ni(1)-O(5)#1   | 170.51(18) |
| O(10)-Ni(1)-O(5)#1 | 92.43(8)   | O(1)-Ni(1)-N(3)     | 91.29(9)   |
| O(10)-Ni(1)-N(3)   | 97.40(9)   | O(5)#1-Ni(1)-N(3)   | 87.51(9)   |
| O(1)-Ni(1)-N(4)    | 87.28(9)   | O(10)-Ni(1)-N(4)    | 90.48(9)   |
| O(5)#1-Ni(1)-N(4)  | 92.62(9)   | N(3)-Ni(1)-N(4)     | 172.11(9)  |
| O(1)-Ni(1)-O(9)    | 85.80(8)   | O(10)-Ni(1)-O(9)    | 174.79(9)  |
| O(5)#1-Ni(1)-O(9)  | 84.73(8)   | N(3)-Ni(1)-O(9)     | 86.85(9)   |
| N(4)-Ni(1)-O(9)    | 85.30(9)   |                     |            |
| <b>Complex 4</b>   |            |                     |            |
| Co(1)-O(3)         | 2.068(8)   | Co(1)-O(10)         | 2.084(9)   |
| Co(1)-O(7)         | 2.095(9)   | Co(1)-O(11)         | 2.121(9)   |
| Co(1)-N(1)         | 2.221(10)  | Co(1)-O(9)          | 2.298(8)   |
| Co(1)-O(13)        | 2.056(8)   | Co(2)-O(4)          | 2.091(8)   |
| Co(2)-O(6)#1       | 2.122(8)   | Co(2)-O(12)         | 2.140(9)   |
| Co(2)-N(3)         | 2.153(9)   | Co(2)-O(9)          | 2.201(7)   |
| O(3)-Co(1)-O(10)   | 177.3(4)   | O(3)-Co(1)-O(7)     | 95.5(3)    |
| O(10)-Co(1)-O(7)   | 86.8(4)    | O(3)-Co(1)-O(11)    | 85.6(4)    |
| O(10)-Co(1)-O(11)  | 92.1(4)    | O(7)-Co(1)-O(11)    | 177.7(4)   |
| O(3)-Co(1)-N(1)    | 92.4(3)    | O(10)-Co(1)-N(1)    | 88.9(4)    |
| O(7)-Co(1)-N(1)    | 96.0(4)    | O(11)-Co(1)-N(1)    | 86.0(4)    |
| O(3)-Co(1)-O(9)    | 93.8(3)    | O(10)-Co(1)-O(9)    | 84.5(3)    |

|                    |            |                   |            |
|--------------------|------------|-------------------|------------|
| O(7)-Co(1)-O(9)    | 95.8(3)    | O(11)-Co(1)-O(9)  | 82.1(3)    |
| N(1)-Co(1)-O(9)    | 166.1(3)   | O(13)-Co(2)-O(4)  | 176.0(3)   |
| O(13)-Co(2)-O(6)#1 | 92.1(4)    | O(4)-Co(2)-O(6)#1 | 85.5(3)    |
| O(13)-Co(2)-O(12)  | 92.1(4)    | O(4)-Co(2)-O(12)  | 90.3(3)    |
| O(6)#1-Co(2)-O(12) | 175.4(3)   | O(13)-Co(2)-N(3)  | 94.7(4)    |
| O(4)-Co(2)-N(3)    | 88.7(3)    | O(6)#1-Co(2)-N(3) | 92.3(4)    |
| O(12)-Co(2)-N(3)   | 85.6(4)    | O(13)-Co(2)-O(9)  | 91.0(3)    |
| O(4)-Co(2)-O(9)    | 86.0(3)    | O(6)#1-Co(2)-O(9) | 95.8(3)    |
| O(12)-Co(2)-O(9)   | 85.9(3)    | N(3)-Co(2)-O(9)   | 169.9(3)   |
| <b>Complex 5</b>   |            |                   |            |
| Co(1)-O(1)#2       | 2.071(5)   | Co(1)-N(1)        | 2.099(6)   |
| Co(1)-O(4)#1       | 2.108(5)   | Co(1)-O(6)        | 2.125(5)   |
| Co(1)-O(3)#1       | 2.293(5)   | Co(1)-O(1)#2      | 2.306(5)   |
| O(1)-Co(1)-O(9)    | 102.8(2)   | O(1)-Co(1)-O(4)#1 | 105.67(19) |
| N(1)-Co(1)-O(9)    | 150.1(2)   | O(1)-Co(1)-O(6)   | 93.1(2)    |
| N(1)-Co(1)-O(9)    | 95.7(2)    | O(4)#1-Co(1)-O(6) | 91.8(2)    |
| O(1)-Co(1)-O(9)    | 165.05(18) | N(1)-Co(1)-O(3)#1 | 91.5(2)    |
| O(4)#1-Co(2)-O(9)  | 59.50(19)  | O(6)-Co(1)-O(3)#1 | 89.5(2)    |
| O(1)-Co(1)-O(9)    | 77.70(19)  | N(1)-Co(1)-O(1)#2 | 91.6(2)    |
| O(4)#1-Co(1)-O(9)  | 85.76(18)  | O(6)-Co(1)-O(1)#2 | 169.41(19) |
| O(3)#1-Co(1)-O(9)  | 98.08(18)  |                   |            |
| <b>Complex 6</b>   |            |                   |            |
| Co(1)-O(7)#1       | 2.006(9)   | Co(1)-O(1)        | 2.114(9)   |
| Co(1)-N(2)         | 2.133(11)  | Co(1)-N(1)        | 2.146(13)  |
| Co(1)-O(9)         | 2.178(9)   | Co(1)-O(2)        | 2.304(9)   |
| O(7)#1-Co(1)-O(1)  | 169.0(4)   | O(7)#1-Co(1)-N(2) | 96.4(4)    |
| O(1)-Co(1)-O(2)    | 93.8(4)    | O(7)#1-Co(1)-N(1) | 93.4(4)    |
| O(1)-Co(1)-O(1)    | 90.6(4)    | N(2)-Co(1)-N(1)   | 91.4(5)    |
| O(7)#1-Co(1)-O(9)  | 88.5(4)    | O(1)-Co(1)-O(9)   | 87.7(3)    |
| O(2)-Co(1)-O(9)    | 87.5(4)    | N(1)-Co(1)-O(9)   | 177.9(4)   |
| O(7)#1-Co(1)-O(2)  | 111.2(4)   | O(1)-Co(1)-O(2)   | 58.5(4)    |
| O(2)-Co(1)-O(2)    | 152.2(4)   | N(1)-Co(1)-O(2)   | 90.4(4)    |
| O(9)-Co(1)-O(2)    | 89.8(3)    |                   |            |

Symmetry transformations used to generate equivalent atoms: #1  $-x+1, -y+1, -z$ ; #2  $-x+2, -y, -z$

for **1**; #1  $-x+1, -y+1, -z+1$  for **2**; #1  $x, -y+1/2, z+1/2$  for **3**; #1  $x, y+1, z$  for **4**; #1  $x, y+1, z$ ; #2  $-x+1, -y+1, -z+1$  for **5**; #1  $x-1, y+1, z+1$  for **6**.

**Table S2.** Hydrogen-bonding geometry ( $\text{\AA}$ ,  $^\circ$ ) for complex **2–4** and **6**.

| D–H $\cdots$ A             | $d(\text{D–H})$ | $d(\text{H}\cdots\text{A})$ | $d(\text{D}\cdots\text{A})$ | $\angle\text{D–H}\cdots\text{A}$ | Symmetry codes        |
|----------------------------|-----------------|-----------------------------|-----------------------------|----------------------------------|-----------------------|
| <b>Complex 2</b>           |                 |                             |                             |                                  |                       |
| O(10)–H(10D) $\cdots$ O(2) | 0.850           | 1.938                       | 2.767                       | 164.78                           | $-x+1, -y+1, -z+1$    |
| O(10)–H(10E) $\cdots$ N(2) | 0.850           | 1.968                       | 2.797                       | 164.85                           | $-x+2, -y+2, -z$      |
| O(11)–H(11C) $\cdots$ O(2) | 0.850           | 2.197                       | 3.029                       | 166.17                           | $-x+1, -y+1, -z+1$    |
| O(11)–H(11D) $\cdots$ O(6) | 0.850           | 2.075                       | 2.906                       | 165.74                           | $x+1, y-1, z$         |
| <b>Complex 3</b>           |                 |                             |                             |                                  |                       |
| O(10)–H(10D) $\cdots$ O(7) | 0.850           | 1.988                       | 2.741                       | 147.19                           | $-x+2, y+1/2, -z+1/2$ |
| <b>Complex 4</b>           |                 |                             |                             |                                  |                       |
| O(9)–H(9A) $\cdots$ O(1)   | 0.850           | 1.959                       | 2.751                       | 154.72                           | $x, y, z-1$           |
| <b>Complex 6</b>           |                 |                             |                             |                                  |                       |
| O(9)–H(9D) $\cdots$ O(8)   | 0.850           | 1.949                       | 2.771                       | 162.59                           | $-x+1, -y+1, -z$      |

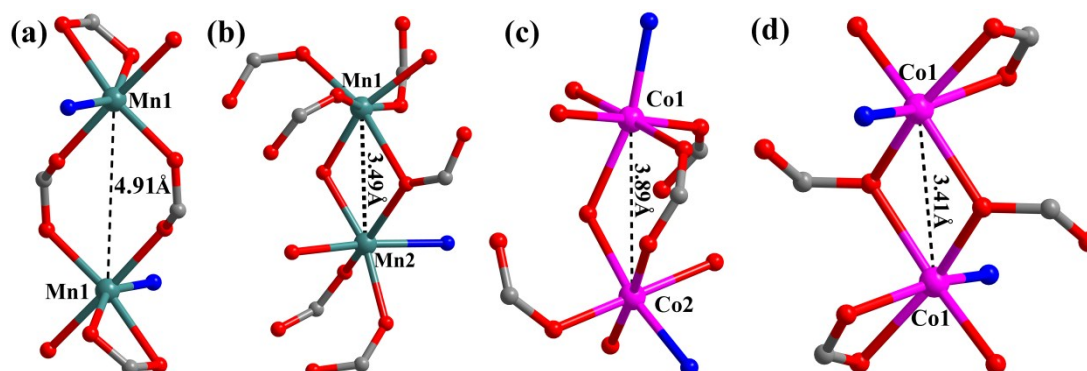

**Fig. S1.** The dinuclear (a)  $\text{Mn}^{\text{II}}$  unit in complex **1**; (b)  $\text{Mn}^{\text{II}}$  unit in complex **2**; (c)  $\text{Co}^{\text{II}}$  unit in complex **4**; (d)  $\text{Co}^{\text{II}}$  unit in complex **5**. Color legend: teal, Mn; pink, Co; gray, C; blue, N; red, O.

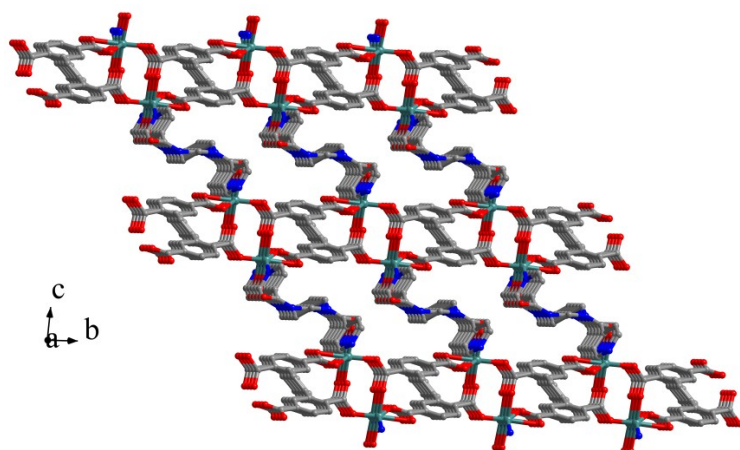

**Fig. S2.** The 3D framework of complex 1. Color legend: teal, Mn; gray, C; blue, N; red, O. All hydrogen atoms, the lattice H<sub>2</sub>O and CH<sub>3</sub>OH are omitted for clarity.

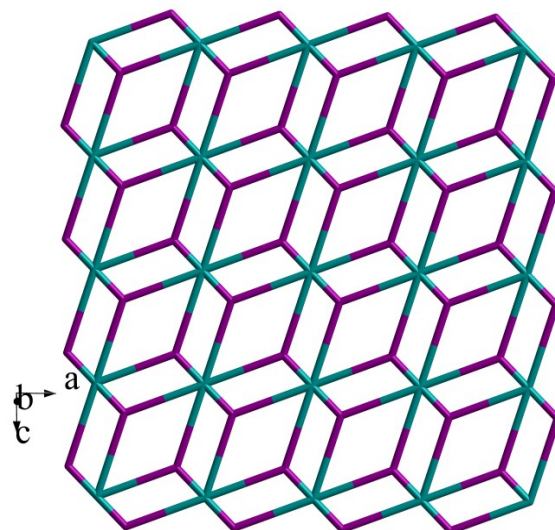

**Fig. S3.** The (3,6)-connected 2D grid in complex 2.

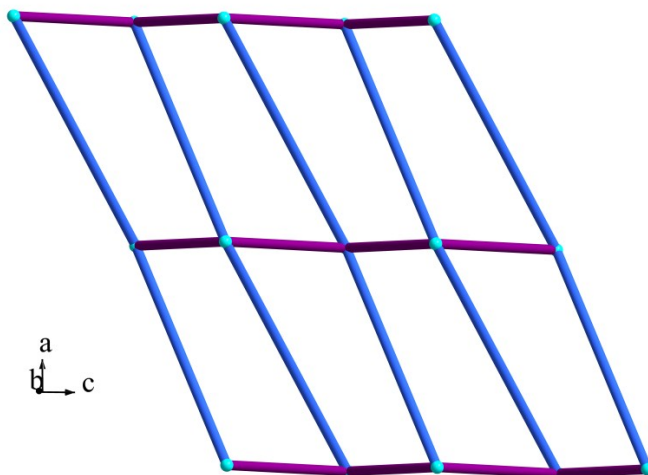

**Fig. S4.** The 4-connected 2D grid in complex **3**.

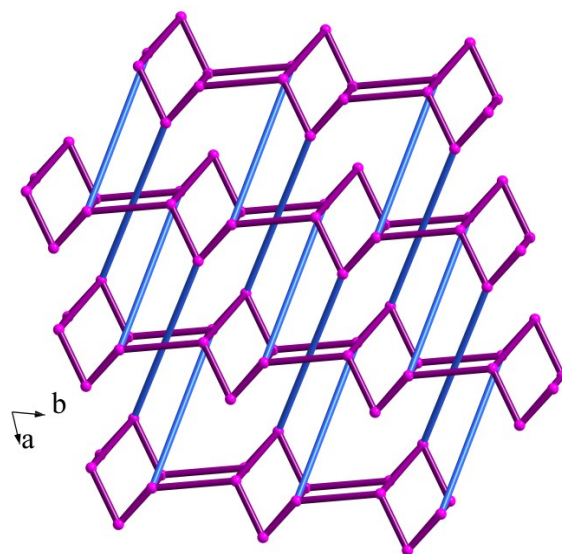

**Fig. S5.** The 4-connected 2D grid in complex **4**.

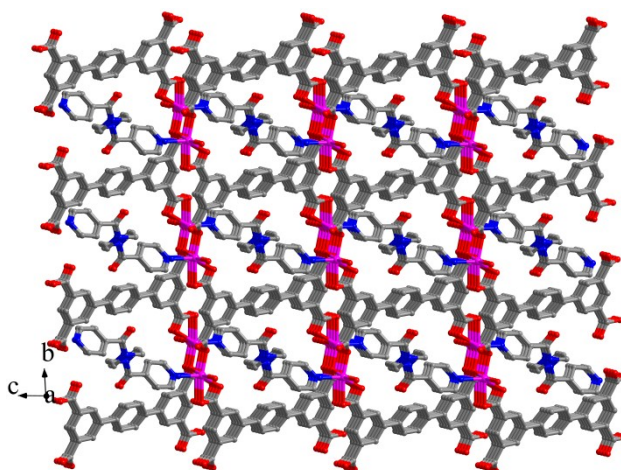

**Fig. S6.** The 3D framework of complex **5**. Color legend: pink, Co; gray, C; blue, N; red, O. All hydrogen atoms and the lattice H<sub>2</sub>O are omitted for clarity.

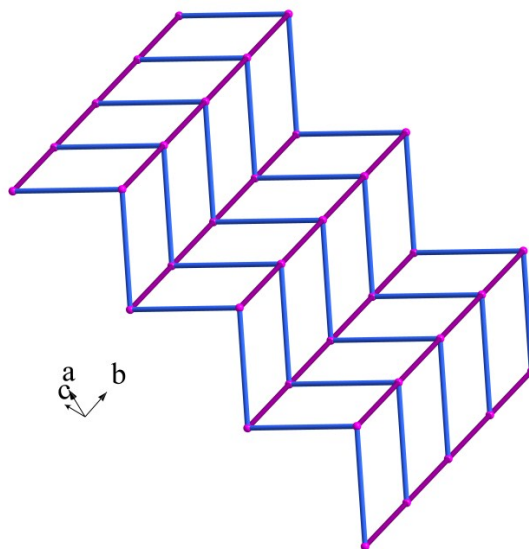

**Fig. S7.** The 4-connected 2D grid in complex 6.

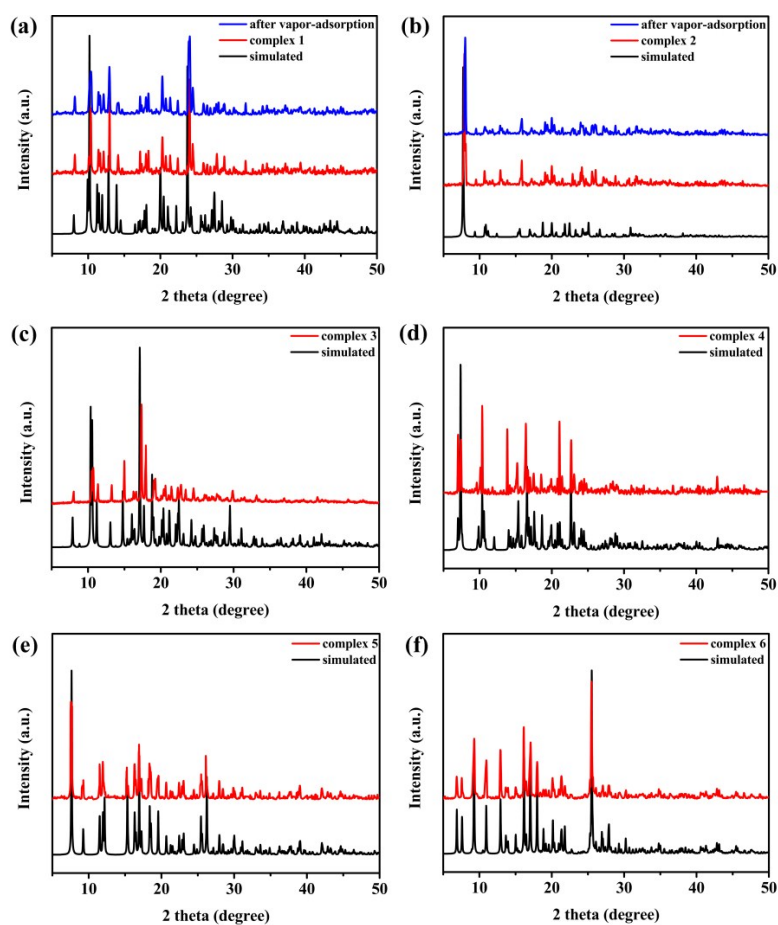

**Fig. S8.** The simulated (black line), experimental samples (red line) and samples after vapor-adsorption (blue line) powder X-ray diffraction patterns for complexes 1–6.

**Fig. S9.** The TG curves of complexes 1–6.

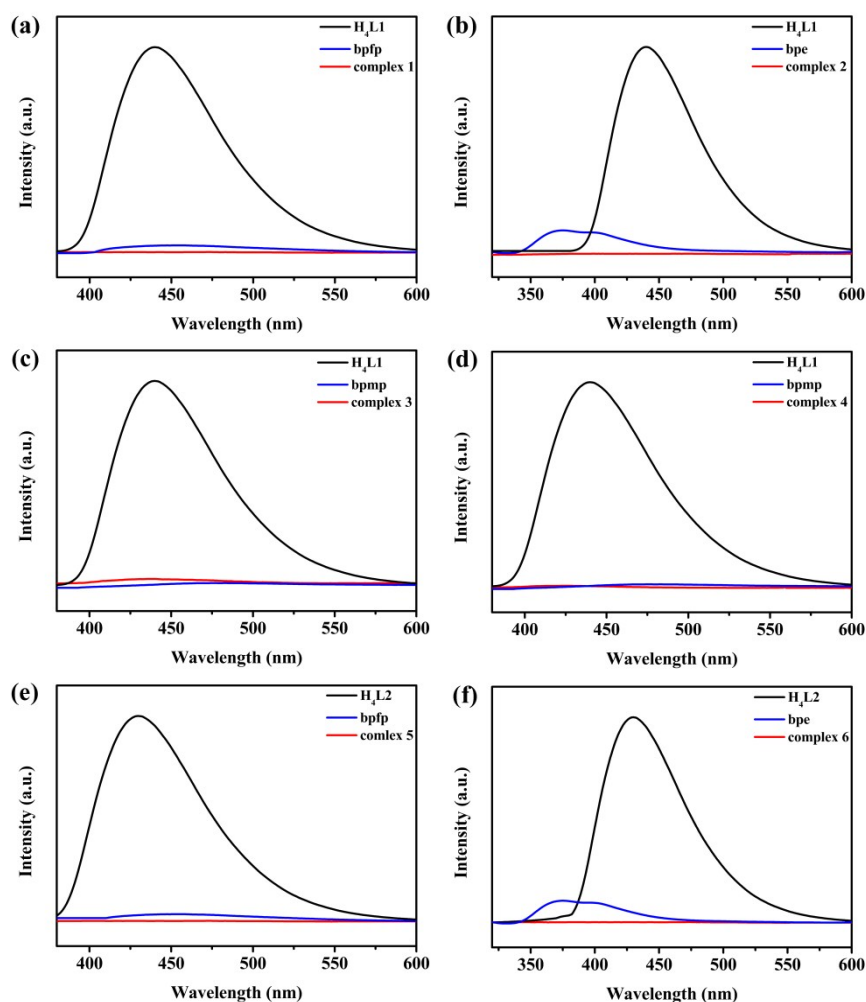

**Fig. S10.** Solid-state fluorescent emission spectra for ligands H<sub>4</sub>L1 and H<sub>4</sub>L2 (black); ligands bpfp, bpe and bpmp (blue); complexes 1–6 (red) in solid state at room temperature.
